# Supplementary material
Source: publisher site journal article supplement (https://www.dovepress.com/article/supplementary_file/614276/614276%20Revised%20Supplementary%20Material.docx)
Supplement: Supplementary file 1 [file 614276%20Revised%20Supplementary%20Material.docx]

**Supplementary Figure S1**

**
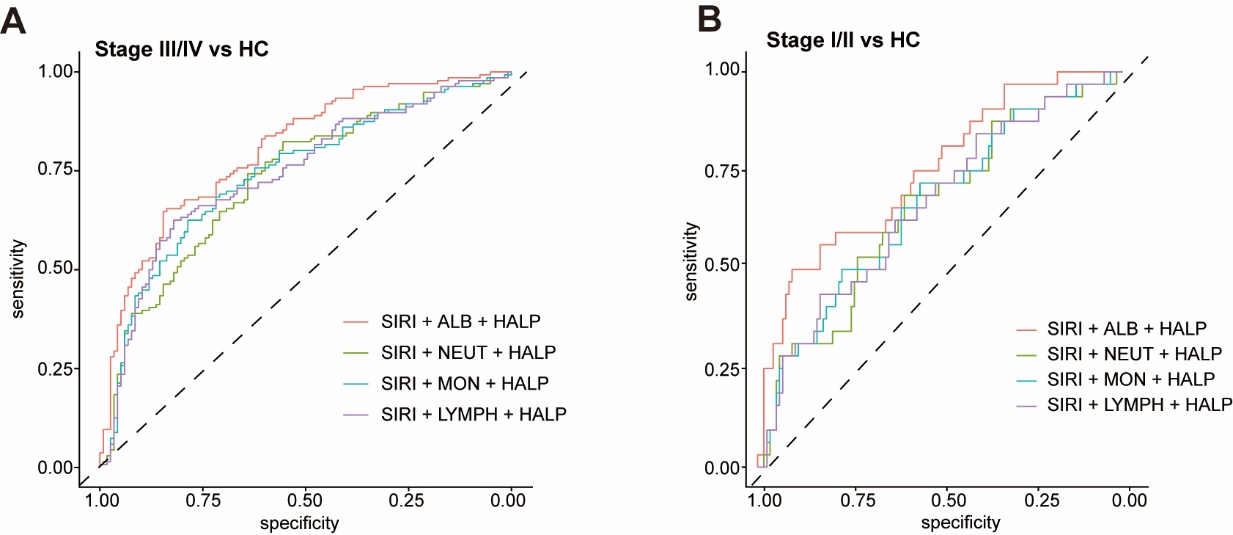
**

Comparison of ROC curves for different combined models in discriminating esophageal cancer from healthy controls.

(A) Pathological stage III/IV esophageal cancer versus healthy controls.

(B) Pathological stage I/II esophageal cancer versus healthy controls.

The evaluated models included SIRI + albumin (ALB) + HALP, SIRI + neutrophil count (NEUT) + HALP, SIRI + monocyte count (MON) + HALP, and SIRI + lymphocyte count (LYMPH) + HALP. All combined models were constructed using binary logistic regression.

**Supplementary Figure S2.**

**
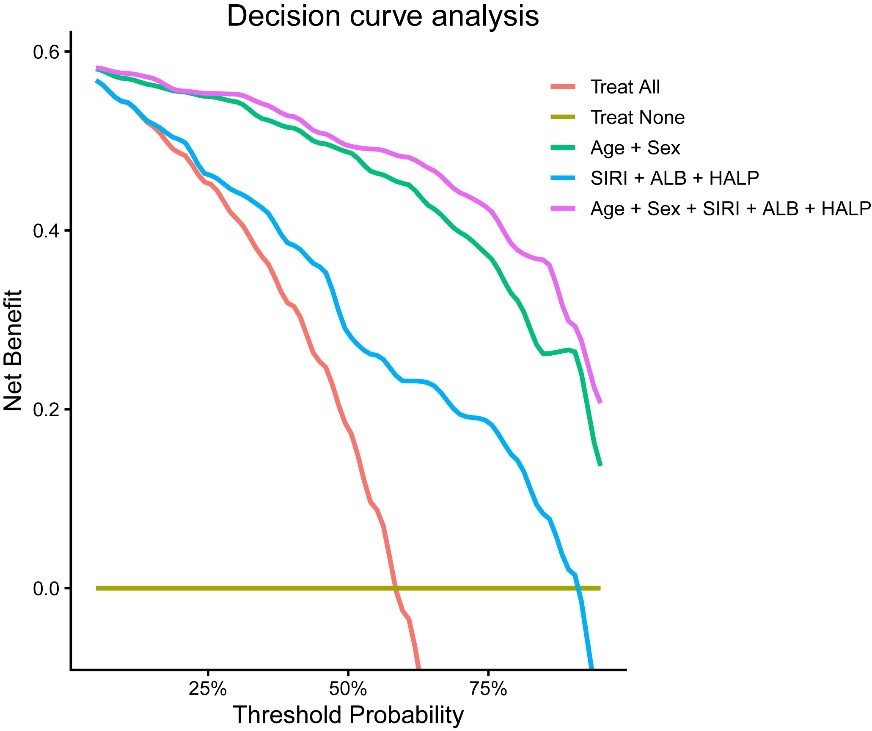
**

Decision curve analysis (DCA) comparing the clinical model (age and sex), biomarker model (SIRI, ALB, and HALP), and full model (age, sex, SIRI, ALB, and HALP) for discrimination of esophageal cancer. The full model demonstrated a higher net benefit than the biomarker-only model and the treat-all or treat-none strategies across most threshold probabilities.

**Supplementary Table S1: Age- and sex-adjusted multivariable logistic regression analyses.**

| **Comparison** | **Term** | **OR_95CI** | **P_value** |
| --- | --- | --- | --- |
| all cancer vs HC | Age | 1.174 (1.110-1.243) | <0.001 |
| all cancer vs HC | Male vs Female | 3.971 (1.293-12.193) | 0.016 |
| all cancer vs HC | SIRI | 2.280 (0.938-5.544) | 0.069 |
| all cancer vs HC | ALB | 1.010 (0.901-1.132) | 0.866 |
| all cancer vs HC | HALP | 0.973 (0.953-0.994) | 0.013 |
| stage III/IV vs HC | Age | 1.164 (1.095-1.238) | <0.001 |
| stage III/IV vs HC | Male vs Female | 3.194 (0.991-10.290) | 0.052 |
| stage III/IV vs HC | SIRI | 2.323 (0.831-6.496) | 0.108 |
| stage III/IV vs HC | ALB | 1.026 (0.905-1.163) | 0.687 |
| stage III/IV vs HC | HALP | 0.965 (0.942-0.989) | 0.005 |
| stage I/II vs HC | Age | 1.148 (1.068-1.233) | <0.001 |
| stage I/II vs HC | Male vs Female | 3.972 (0.675-23.369) | 0.127 |
| stage I/II vs HC | SIRI | 1.750 (0.642-4.772) | 0.274 |
| stage I/II vs HC | ALB | 1.013 (0.856-1.199) | 0.882 |
| stage I/II vs HC | HALP | 0.986 (0.959-1.014) | 0.326 |

**Supplementary Table S2: Bootstrap internal validation results**

| **Comparison** | **N** | **AUC_95CI** | **Optimism** | **AUC corrected** | **N boot** | **N valid boot** |
| --- | --- | --- | --- | --- | --- | --- |
| all cancer vs HC | 285 | 0.970 (0.952-0.988) | 0.004 | 0.966 | 1000 | 1000 |
| stage III/IV vs HC | 253 | 0.974 (0.958-0.990) | 0.005 | 0.97 | 1000 | 1000 |
| stage I/II vs HC | 149 | 0.955 (0.925-0.985) | 0.015 | 0.94 | 1000 | 1000 |

**Supplementary Table S3: ROC analysis in the age- and sex-matched cohort**

| **Indicator** | **AUC** | **CI_low** | **CI_high** |
| --- | --- | --- | --- |
| SIRI | 0.73 | 0.60 | 0.85 |
| ALB | 0.61 | 0.47 | 0.75 |
| HALP | 0.76 | 0.65 | 0.88 |
| SIRI + ALB + HALP | 0.81 | 0.70 | 0.92 |
